# Supplementary material
Source: Royal Society of Chemistry journal article supplement (doi:10.1039/d6ce00173d)
Supplement: d6ce00173d1.pdf [file d6ce00173d1.pdf]

## **Supplementary Information**

### **Implication of Ionic Liquids in Empagliflozin-Isonicotinic acid Eutectic System: Mechanochemical Synthesis, Characterisation and Performance Attributes**

**Md Huzaifa Khan, Mohd Danish Khan and Jamshed Haneef\***

Medicinal and Solid-State Chemistry Lab, Department of Pharmaceutical Chemistry, School of Pharmaceutical Education and Research, Jamia Hamdard, New Delhi 110 062, India

#### **Contents:**

**Table S1:** Different ILs employed during ILAG experiments

**Figure S1:** DSC thermograms of EPG-INA binary mixture obtained by neat grinding

**Figure S2:** DSC curves of ground products obtained at different milling time intervals (10, 20, and 30 min) by (a) LAG and (b) ILAG approach

**Figure S3:** Pre- and post-stability PXRD patterns of (a) EINA and (b) EINA-IL eutectic mixtures

**Figure S4:** Optimized structure of (a) empagliflozin and (b) isonicotinic acid

**Figure S5:** Molecular electrostatic potential (MEP) surface mapping of the (a) EPG dimer, (b) INA dimer, (c) EINA, and (d) EINA-IL complexes obtained by LAG and ILAG

**Figure S6:** <sup>1</sup>H-NMR spectrum of empagliflozin (EPG)

**Figure S7:** <sup>1</sup>H-NMR spectrum of isonicotinic acid (INA)

**Figure S8:** <sup>1</sup>H-NMR spectrum of eutectic mixture (EINA) obtained by LAG

**Figure S9:** <sup>1</sup>H-NMR spectrum of eutectic mixture (EINA-IL) obtained by ILAG

| Table S1: Different ILs employed during ILAG experiments                  |                   |                                                                                      |                    |
|---------------------------------------------------------------------------|-------------------|--------------------------------------------------------------------------------------|--------------------|
| ILs                                                                       | Abbreviation used | Structure                                                                            | Outcome            |
| 1-Butyl-3-methylimidazolium Chloride                                      | IL1               | 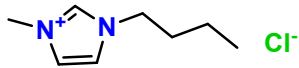   | Paste              |
| 1-Ethyl-3-methylimidazolium Chloride                                      | IL2               |    | Paste              |
| 1-Butyl-3-methylimidazolium Tetrafluoroborate                             | IL3               |    | Crystalline powder |
| 1-Butyl-2,3-dimethylimidazolium Tetrafluoroborate                         | IL4               |    | Crystalline powder |
| 1-(2-Hydroxyethyl)-3-methylimidazolium Tetrafluoroborate                  | IL5               |    | Crystalline powder |
| 1-Ethyl-3-methylimidazolium Tetrafluoroborate                             | IL6               |  | Crystalline powder |
| 1-Ethyl-3-methylimidazolium EthylSulfate                                  | IL7               |  | Paste              |
| 1-Ethyl-3-methylimidazolium p-Toluenesulfonate                            | IL8               |  | Paste              |
| 1-Butyl-3-methylimidazolium Bis(trifluoromethanesulfonyl)imide            | IL9               |  | Paste              |
| 1-(2-Hydroxyethyl)-3-methylimidazolium Bis(trifluoromethanesulfonyl)imide | IL10              |  | Paste              |
| 1-Ethyl-3-methylimidazolium Acetate                                       | IL11              |  | Paste              |

|                                                  |      |                                                                                    |       |
|--------------------------------------------------|------|------------------------------------------------------------------------------------|-------|
| 1-Ethyl-3-methylimidazolium<br>Diethyl Phosphate | IL12 | 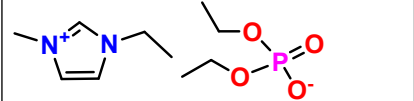 | Paste |
|--------------------------------------------------|------|------------------------------------------------------------------------------------|-------|

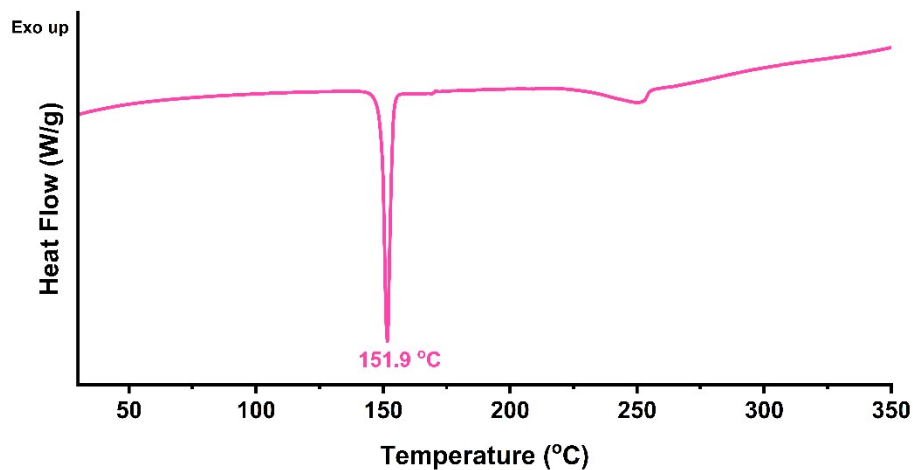

**Figure S1:** DSC thermograms of EPG-INA binary mixture obtained by neat grinding

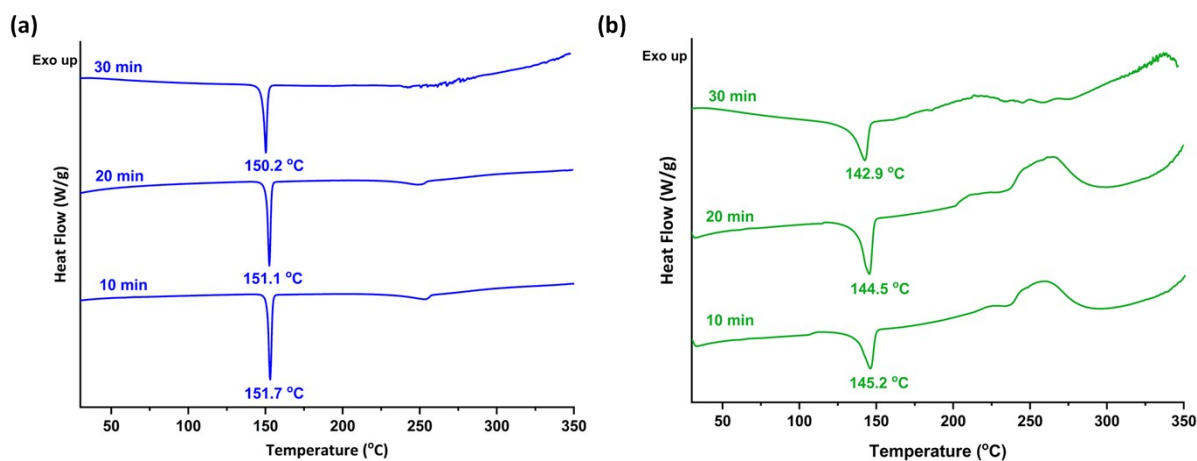

**Figure S2:** DSC curves of ground products obtained at different milling time intervals (10, 20, and 30 min) by (a) LAG and (b) ILAG approach

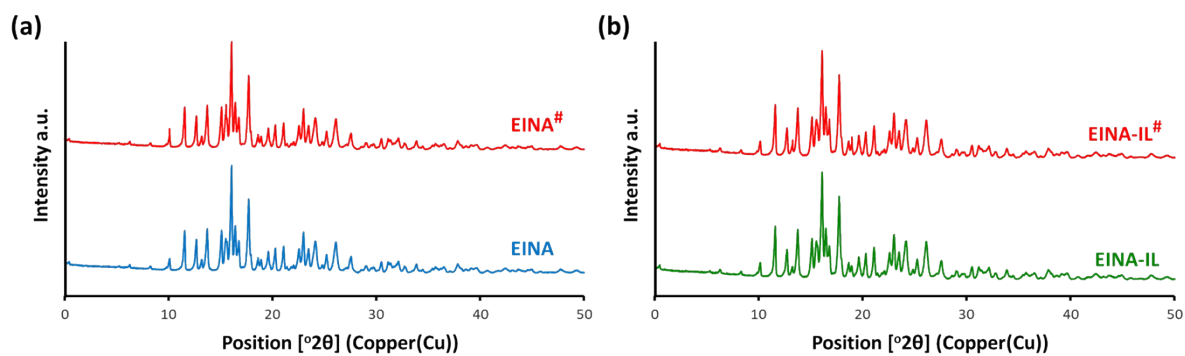

**Figure S3:** Pre- and post-stability PXR patterns of (a) EINA and (b) EINA-IL eutectic mixtures (#represents post-stability sample)

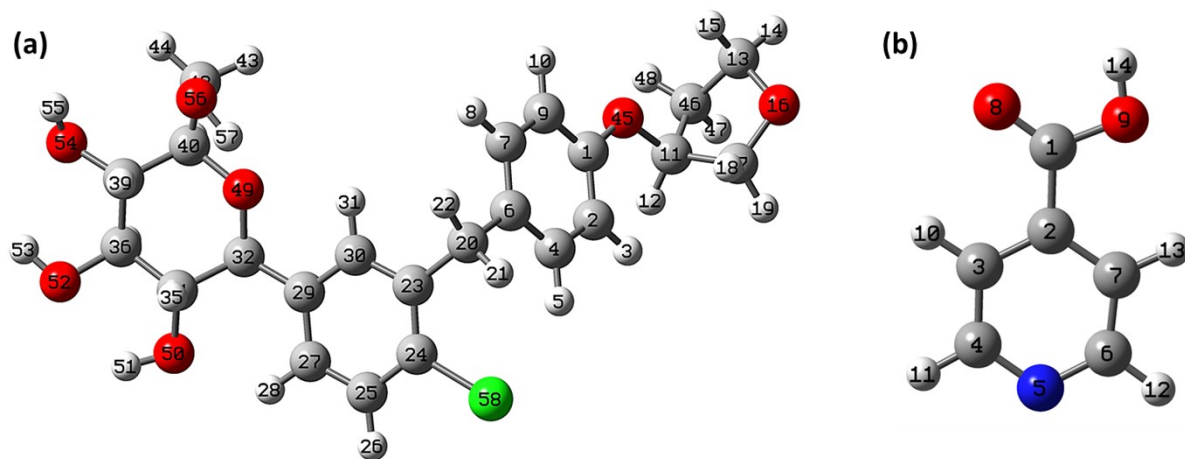

**Figure S4:** Optimized structure of empagliflozin (a) and isonicotinic acid (b)

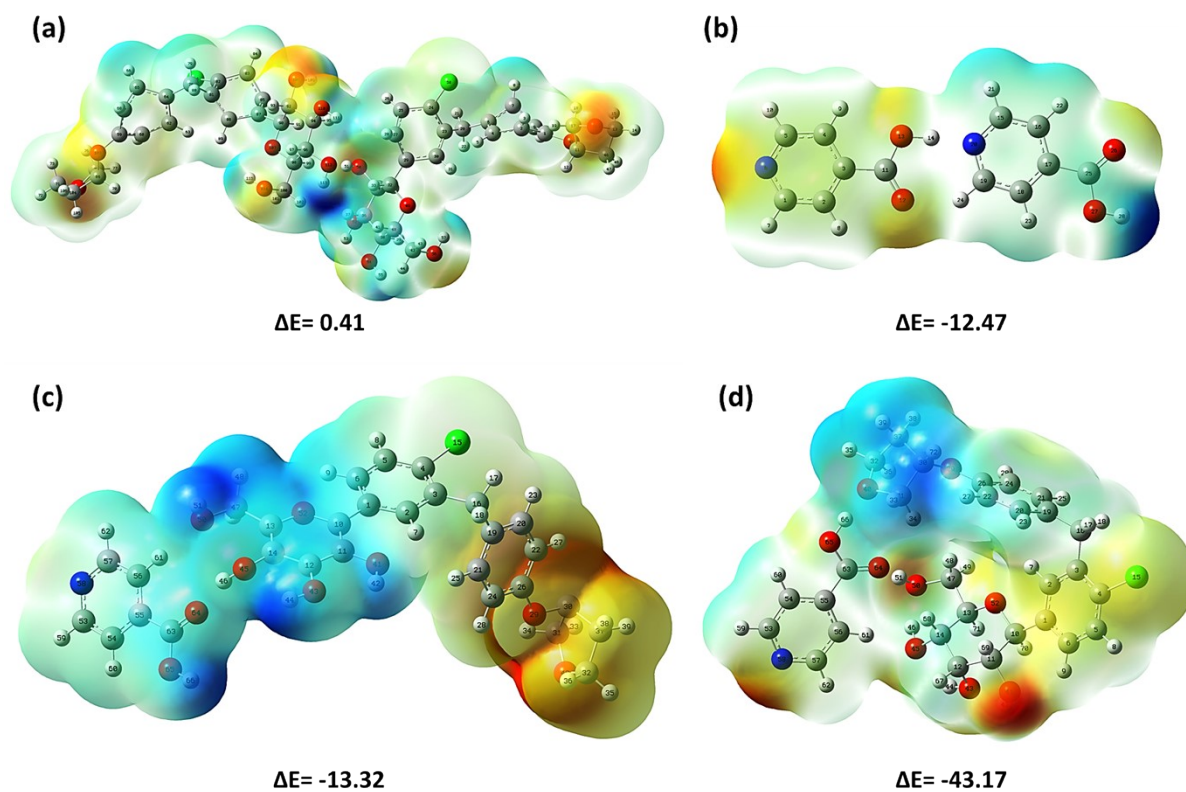

**Figure S5:** Molecular electrostatic potential (MEP) surface mapping of the (a) EPG dimer, (b) INA dimer, (c & d) EINA and EINA-IL complexes obtained by LAG and ILAG, respectively.

NMR DU.10.fid — EPG

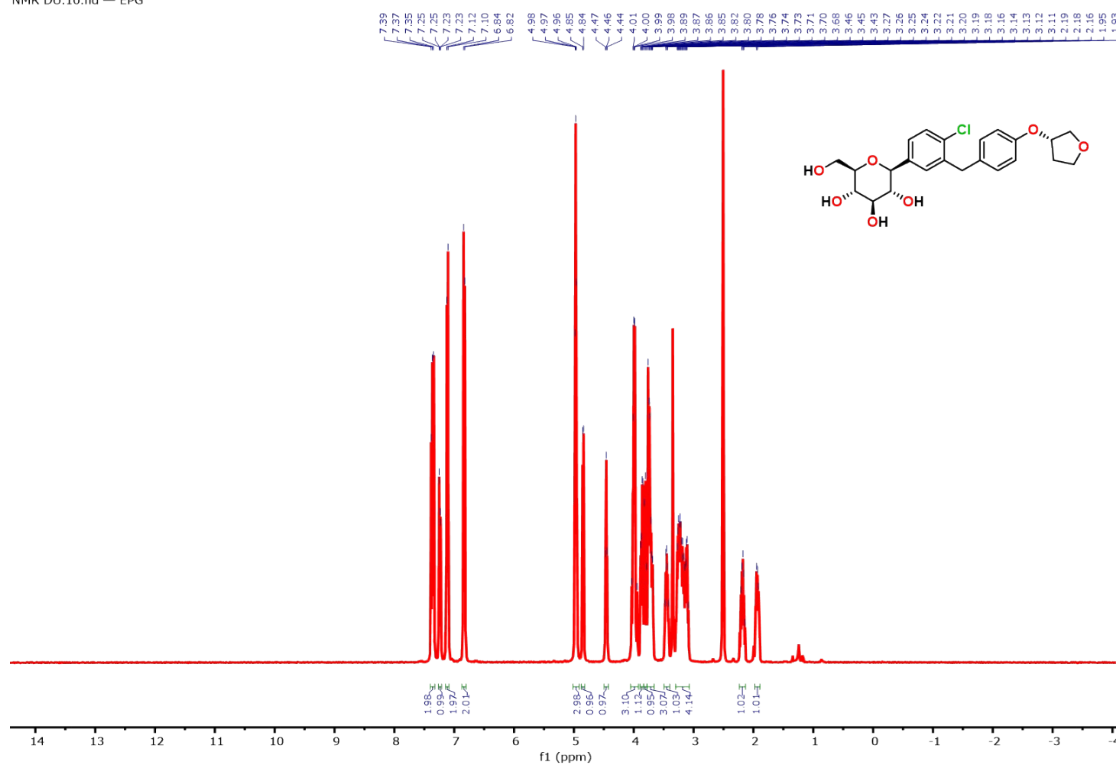

Figure S6: <sup>1</sup>H-NMR spectrum of empagliflozin (EPG)

NMR DU.20.fid  
INA

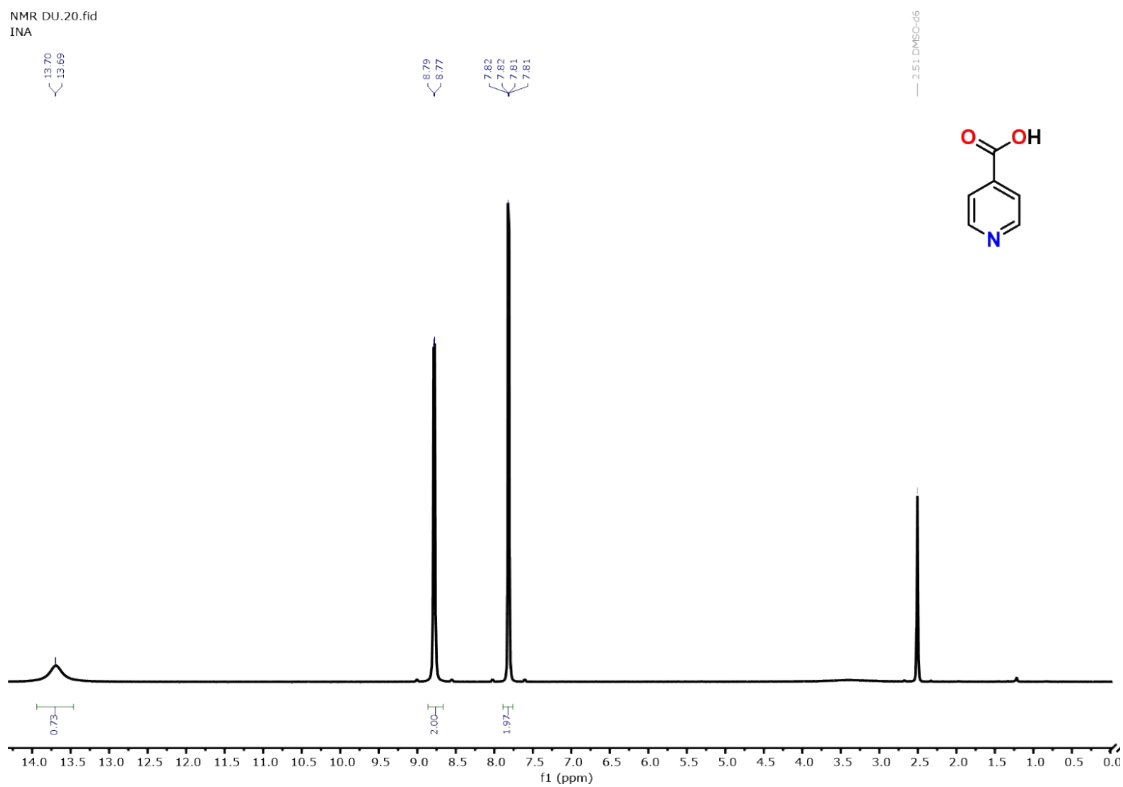

Figure S7: <sup>1</sup>H-NMR spectrum of isonicotinic acid (INA)

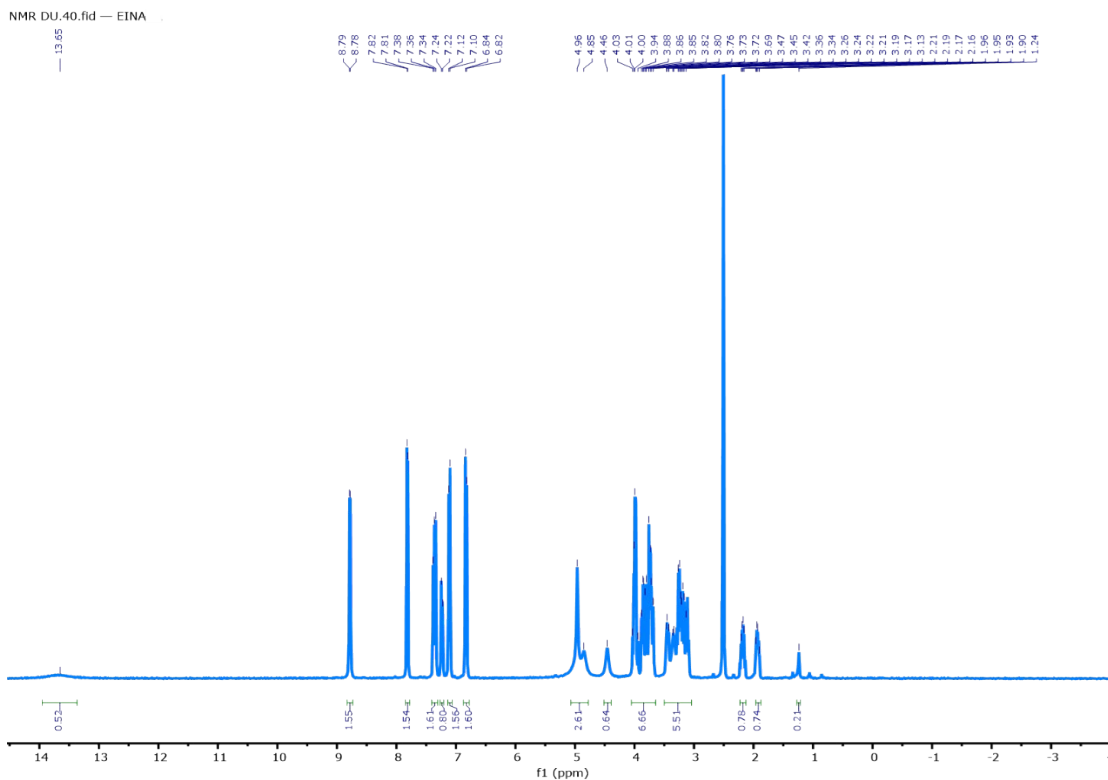

Figure S8:  $^1\text{H}$ -NMR spectrum of eutectic mixture (EINA) obtained by LAG

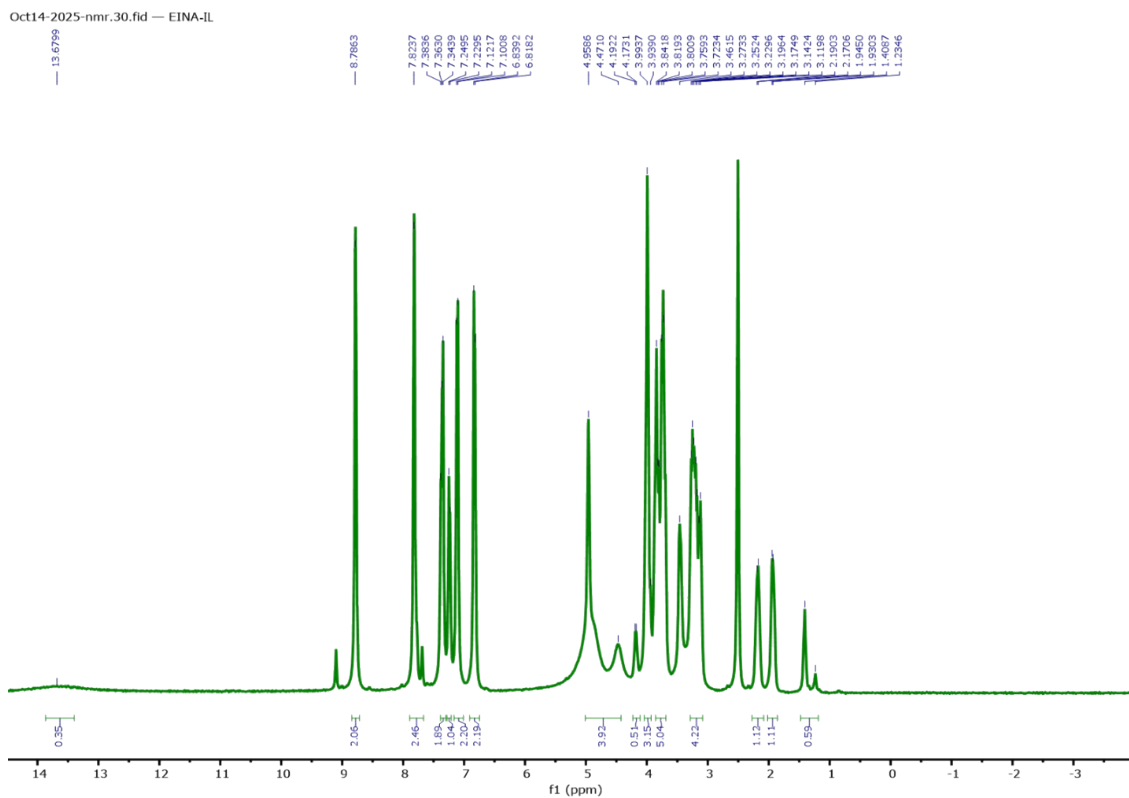

Figure S9:  $^1\text{H}$ -NMR spectrum of eutectic mixture (EINA-IL) obtained by ILAG
